# Supplementary material
Source: publisher figshare collection journal article supplement (https://frontiersin.figshare.com/ndownloader/files/25093268)
Supplement: Supplementary file [file 25093268]

**Supplemental Table 2. List of NK Cell KIR Genotypes and HLA Haplotypes. For HLA typing molecular (Mol) and serological (Sero) typing information is included.**

| KIR Genotypes  | Cen A | Cen B | Tel A | Tel B | 2DS1 | 2DS2 | 2DS3 | 2DS4 | 2DS5 | 3DS1 | 2DL1 | 2DL2 | 2DL3 | 2DL4 | 2DL5 | 2DP1 | 3DL1 | 3DL2 | 3DL3 | 3DP1 |
|----------------|-------|-------|-------|-------|------|------|------|------|------|------|------|------|------|------|------|------|------|------|------|------|
| UCB Donor 1    | +     | +     | +     | +     | +    | +    | -    | +    | +    | +    | +    | +    | +    | +    | +    | +    | +    | +    | +    | +    |
| UCB Donor 2    | +     | +     | -     | +     | +    | -    | +    | -    | +    | +    | +    | +    | +    | +    | +    | +    | -    | +    | +    | +    |
| UCB Donor 3    | +     | +     | +     | -     | -    | -    | +    | +    | -    | -    | +    | +    | +    | +    | +    | +    | +    | +    | +    | +    |
| KIRNeg iPSC-NK | -     | +     | -     | +     | +    | +    | +    | -    | +    | +    | +    | +    | -    | +    | +    | +    | -    | +    | +    | +    |
| KIRPos iPSC-NK | +     | +     | +     | +     | +    | +    | -    | +    | +    | +    | +    | +    | +    | +    | +    | +    | +    | +    | +    | +    |

| HLA Haplotypes | A   |      | A   |      | B (Bw) |         | B (Bw) |         | C      |         | C   |         |
|----------------|-----|------|-----|------|--------|---------|--------|---------|--------|---------|-----|---------|
|                | Mol | Sero | Mol | Sero | Mol    | Sero    | Mol    | Sero    | Mol    | Sero    | Mol | Sero    |
| UCB Donor 1    | *11 | A11  | *11 | A11  | *52    | B52 (4) | *35    | B35 (6) | *04    | 4 (C2)  | *12 | 12 (C1) |
| UCB Donor 2    | *11 | A11  | *33 | A33  | *44    | B44 (4) | *14:02 | B65 (6) | *05    | 5 (C2)  | *08 | 8 (C1)  |
| UCB Donor 3    | *26 | A26  | *33 | A33  | *58    | B58 (4) | *56    | B56 (6) | *03:02 | 10 (C1) | *07 | 7 (C1)  |
| KIRNeg iPSC-NK | *11 | A11  | *68 | A68  | *52    | B52 (4) | *57    | B57 (4) | *06    | 6 (C2)  | *12 | 12 (C1) |
| KIRPos iPSC-NK | *23 | A23  | *25 | A25  | *07    | B7 (6)  | *08    | B8 (6)  | *04    | 4 (C2)  | *12 | 12 (C1) |
